# Supplementary material
Source: PubMed Central journal article supplement (PMC2984157)

# Supporting Information

Reiley et al. 10.1073/pnas.1006298107

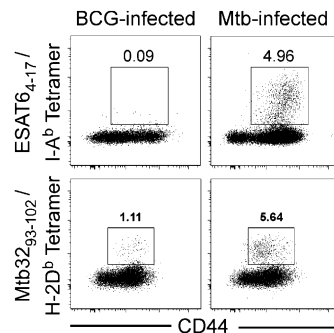

**Fig. S1.** ESAT6<sub>4-17</sub>/I-A<sup>b</sup> Tetramer specificity. Lymphocytes isolated from the lung of either bacillus Calmette-Guérin- (i.v. injected with  $2 \times 10^6$  bacteria) or *Mycobacterium tuberculosis* (Mtb)-infected (aerosol with 75 CFU) mice on day 45 postinfection. Representative dot plots of CD44 and ESAT6<sub>4-17</sub>/I-A<sup>b</sup> tetramer staining gated on CD4 T cells or Mtb32<sub>93-102</sub>/H-2D<sup>b</sup> tetramer staining gated on CD8 T cells. Dot plots are from the lungs of three mice analyzed within each group.

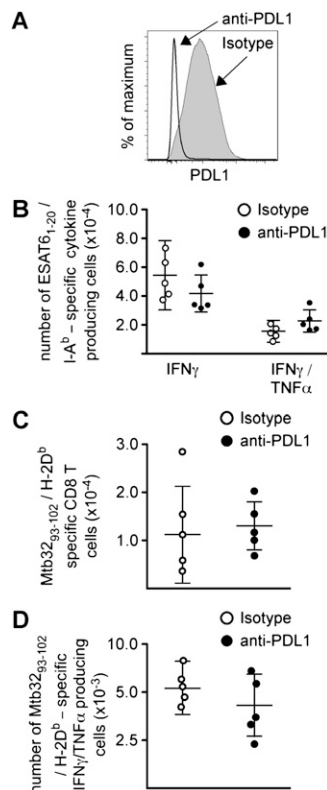

**Fig. S2.** Programmed death-1 (PD-1)/PD-1-programmed death ligand 1 (PDL1) blockade does not affect the number or function of antigen-specific T cells. Infected mice were administered a single injection of isotype or anti-PDL1 antibody. (A) PDL1 surface expression on lung lymphocytes 24 h after antibody administration, anti-PDL1 (solid black line), and isotype (shaded histogram). (B) Infected mice were treated with anti-PDL1, from day 30 to day 45 postinfection. Lymphocytes isolated from the lungs were stimulated with ESAT6<sub>1-20</sub> peptide for 5 h in the presence of brefeldin A. The number of ESAT6-specific IFN $\gamma$ - and IFN $\gamma$ /TNF $\alpha$ -producing CD4 T cells from each group is shown. (C) The numbers of Mtb32<sub>93-102</sub>/H-2D<sup>b</sup> antigen-specific CD8 T cells from the lung of treated mice are shown. (D) Lymphocytes isolated from the lungs were stimulated with Mtb32<sub>93-102</sub> peptide for 5 h in the presence of brefeldin A. The number of Mtb32-specific IFN $\gamma$ /TNF $\alpha$ -producing CD4 T cells from each group is shown. The error bars indicate the SD. Data are presented from the lungs of five mice analyzed on each day. The data are representative of two experiments of similar design.

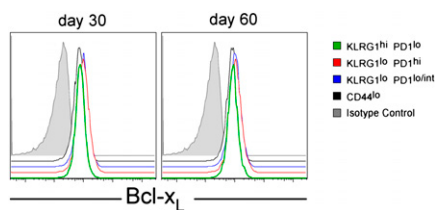

Supplement: 1006298107_pnas.201006298SI.pdf [file 1006298107_pnas.201006298SI.pdf]
